# Supplementary material for: The Role of mRNA Alternative Splicing in Macrophages Infected with Mycobacterium tuberculosis: A Field Needing to Be Discovered
Source: MDPI journal article supplement (doi:10.3390/molecules29081798), 2024-04-16
Supplement: s1 [file s1]

| Gene                             | Response to <i>Mtb</i> infection                                                                                                                                                                                                                                                                                                                                                                                                                                                    |
|----------------------------------|-------------------------------------------------------------------------------------------------------------------------------------------------------------------------------------------------------------------------------------------------------------------------------------------------------------------------------------------------------------------------------------------------------------------------------------------------------------------------------------|
| RAB8B                            | RAB8B truncated variant is enriched in H37Rv-infected macrophages.                                                                                                                                                                                                                                                                                                                                                                                                                  |
| ABCC2                            | ABCC2 were upregulated in macrophages infected with <i>M. tuberculosis</i> .                                                                                                                                                                                                                                                                                                                                                                                                        |
| TNFAIP2                          | Generate TB-specific alternative splicing isoforms.                                                                                                                                                                                                                                                                                                                                                                                                                                 |
| SLC26A11                         | Generate TB-specific alternative splicing isoforms.                                                                                                                                                                                                                                                                                                                                                                                                                                 |
| IFI27                            | Generate TB-specific alternative splicing isoforms.                                                                                                                                                                                                                                                                                                                                                                                                                                 |
| IFIT3                            | Generate TB-specific alternative splicing isoforms.                                                                                                                                                                                                                                                                                                                                                                                                                                 |
| OAS1                             | Generate TB-specific alternative splicing isoforms.                                                                                                                                                                                                                                                                                                                                                                                                                                 |
| OASL                             | Generate TB-specific alternative splicing isoforms.                                                                                                                                                                                                                                                                                                                                                                                                                                 |
| GNB1                             | Generate TB-specific alternative splicing isoforms.                                                                                                                                                                                                                                                                                                                                                                                                                                 |
| TNFAIP2                          | Generate TB-specific alternative splicing isoforms.                                                                                                                                                                                                                                                                                                                                                                                                                                 |
| S100A8-intron1-retention intron  | Generate TB-specific alternative splicing isoforms.                                                                                                                                                                                                                                                                                                                                                                                                                                 |
| RPS20-exon1 alternative promoter | Generate TB-specific alternative splicing isoforms.                                                                                                                                                                                                                                                                                                                                                                                                                                 |
| KIF13B-exon4-skipping exit       | Generate TB-specific alternative splicing isoforms.                                                                                                                                                                                                                                                                                                                                                                                                                                 |
| UBE2B-exon7-SE                   | Generate TB-specific alternative splicing isoforms.                                                                                                                                                                                                                                                                                                                                                                                                                                 |
| SRSF2                            | After infection with H37Rv, the expression levels of SRSF2 were significantly downregulated.                                                                                                                                                                                                                                                                                                                                                                                        |
| SRSF3                            | After infection with H37Rv, the expression levels of SRSF3 were significantly downregulated.                                                                                                                                                                                                                                                                                                                                                                                        |
| SRp75                            | After infection with H37Rv, the expression levels of SRp75 were significantly downregulated.                                                                                                                                                                                                                                                                                                                                                                                        |
| SF3a                             | After infection with H37Rv, the expression levels of SF3a were significantly downregulated.                                                                                                                                                                                                                                                                                                                                                                                         |
| IL-4                             | The mRNA level of IL-4 expression was higher in unstimulated peripheral blood mononuclear cells of tuberculosis patients. Expression of IL-4 $\delta$ 2 was increased in latently infected healthy TB contacts.                                                                                                                                                                                                                                                                     |
| IL7                              | There are nine isoforms of IL7, including IL7c, IL7 $\delta$ 3, IL7 $\delta$ 4, IL7 $\delta$ 5, IL7 $\delta$ 3/4, IL7 $\delta$ 4/5, IL7 $\delta$ 3/4/5, IL7 $\delta$ 3/4-52bp E2, and IL7 $\delta$ 4/5-52bp E2. In peripheral blood monocytes of non-human primates, the highest expression level is IL-7c. IL-7 $\delta$ 5 and IL-7 $\delta$ 4/5 were mainly expressed in the granuloma tissue from patients with latent tuberculosis.                                             |
| IL-7R                            | IL-7R has three isoforms, namely IL-7Rc, IL-7R $\delta$ 6, and IL-7R $\delta$ 5/6. sIL-7R acts as a isoform that inhibits IL-7 activity, and appears to have the opposite effect to full-length IL-7Rc.                                                                                                                                                                                                                                                                             |
| IL12-R $\beta$ 1                 | IL12-R $\beta$ 1 is extremely important for humans to resist various intracellular pathogens, including <i>Mtb</i> .                                                                                                                                                                                                                                                                                                                                                                |
| IL-12R $\beta$ 1 $\Delta$ TM     | The role of IL-12R $\beta$ 1 $\Delta$ TM is to enhance IL-12R $\beta$ 1-dependent dendritic cells (DCs) migration and activate <i>Mtb</i> -specific T cells. Mice lacking IL-12R $\beta$ 1 $\Delta$ TM will have an impact on their ability to control infection with <i>Mtb</i> in extrapulmonary lung organs.                                                                                                                                                                     |
| IL-32                            | IL-32 has nine isoforms, namely IL-32 $\alpha$ , IL-32 $\beta$ , IL-32 $\gamma$ , IL-32 $\delta$ , IL-32 $\epsilon$ , IL-32 $\zeta$ , IL-32 $\eta$ , IL-32 $\theta$ , and IL-32s. The expression level of IL-32 in patients with pulmonary tuberculosis was lower than that in healthy people. Compared with mouse macrophages expressing IL-32 $\gamma$ and IL-32 $\beta$ , macrophages expressing IL-32 $\gamma$ alone were more effective in limiting the growth of <i>Mtb</i> . |

Table S1: Changes in alternative splicing after macrophage infection by *Mycobacterium tuberculosis*.
